# Supplementary material for: Fibroblast Growth Factor (FGF) 23 and FGF Receptor 4 promote cardiac metabolic remodeling in chronic kidney disease
Source: Research Square preprint supplement (doi:10.21203/rs.3.rs-3705543/v1), 2023-12-23

Supplemental figure S1- cardiac functional parameters of wildtype mice with adenine induced CKD

□ Ctrl ■ 0 weeks CKD ■ 8 weeks CKD ■ 12 weeks CKD ■ 16 weeks CKD

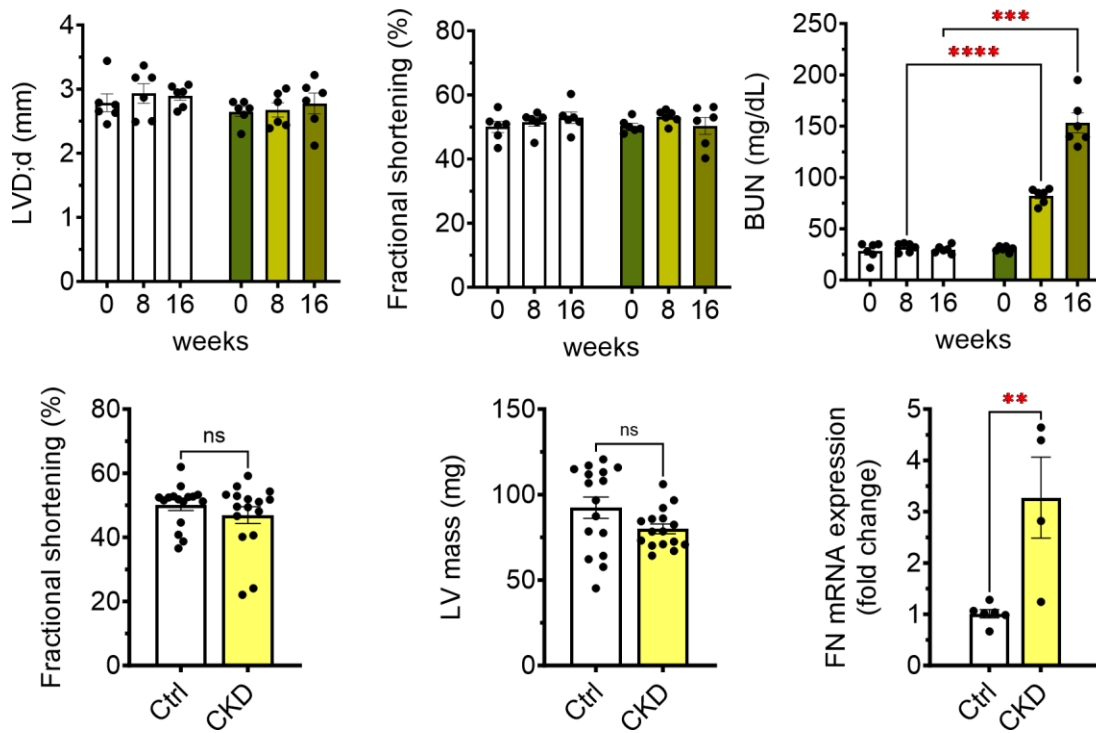

Supplemental figure S2 – cardiac characteristics of Col4a3<sup>-/-</sup> mice

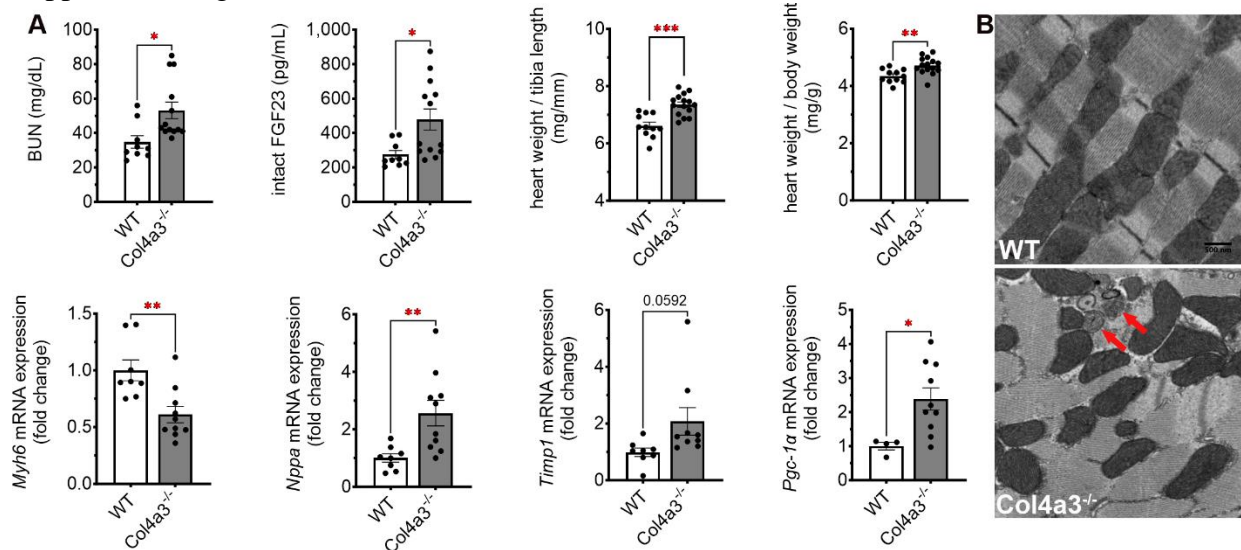

Supplemental Figure S3 - Hypertrophy makers in NRVM treated for 1h with FGF23

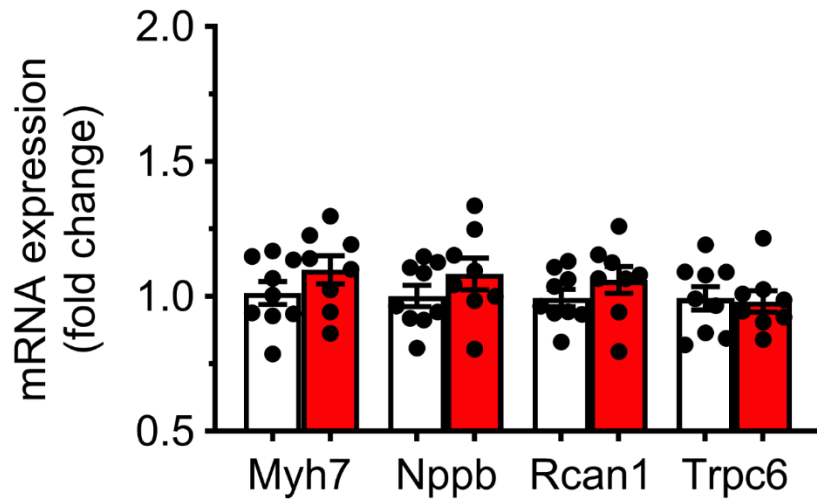

Supplemental figure S4 – Additional renal and cardiac function parameters of FGFR4-Arg385 mice.

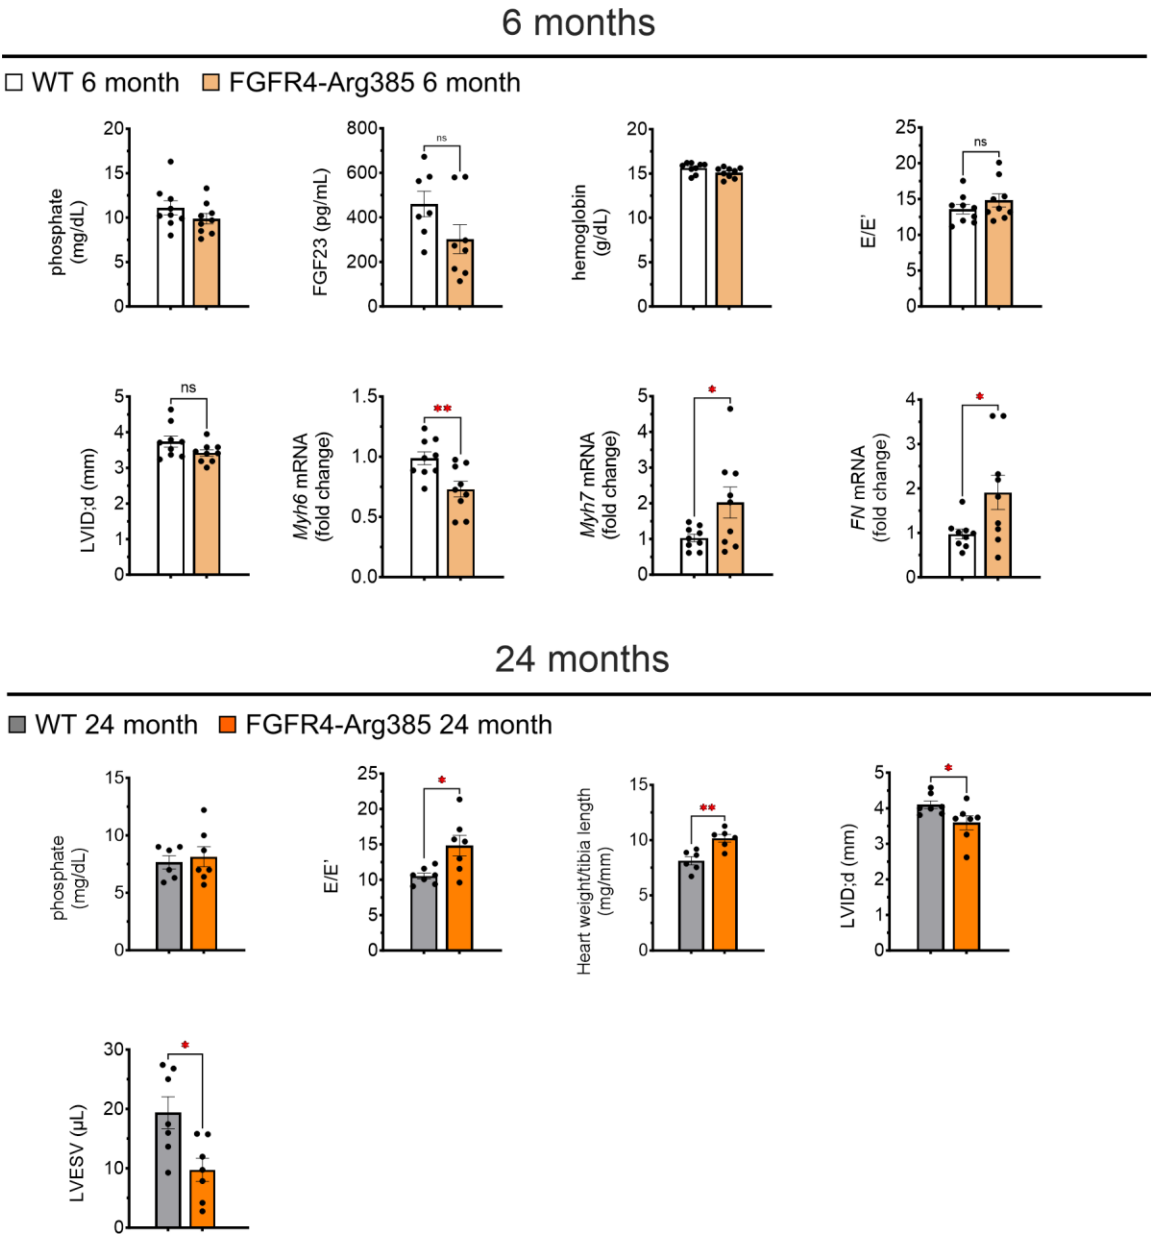

Supplemental figure S5 – renal and cardiac function in  $FGFR4^{-/-}$  mice with CKD

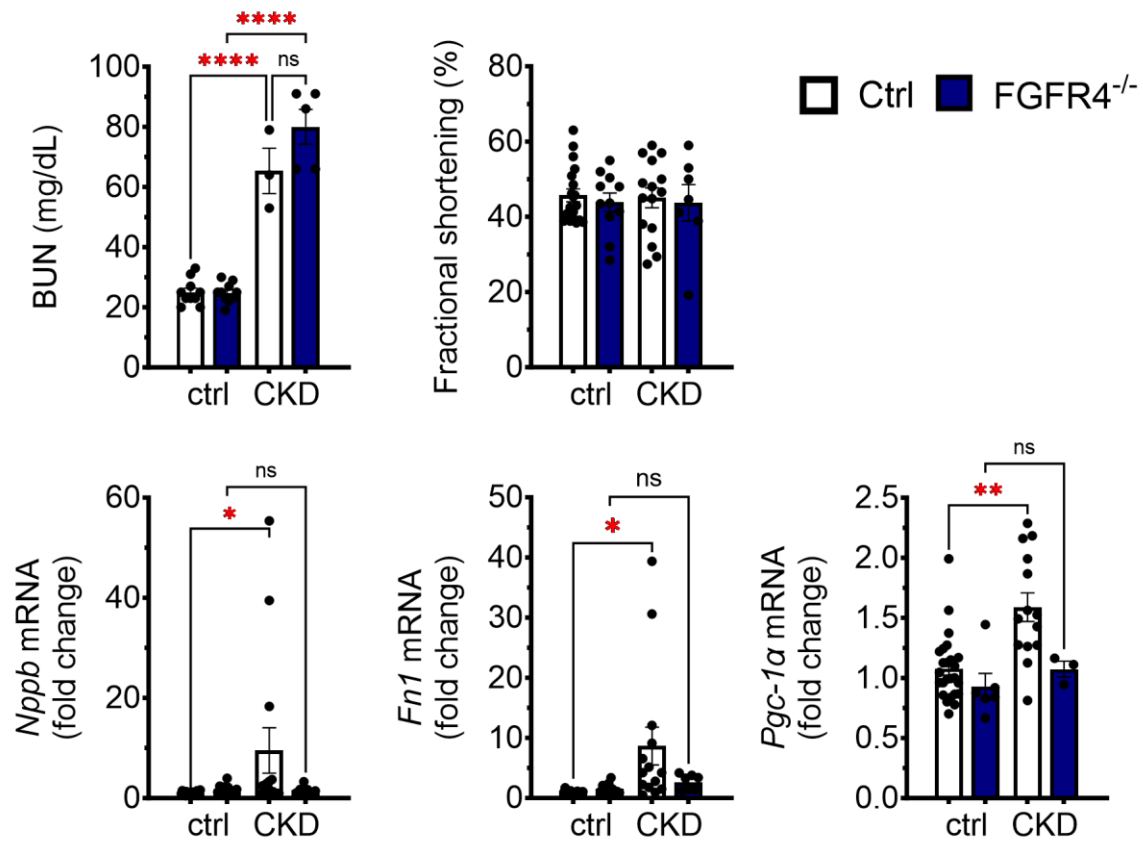

Supplemental figure S6 - Tissue specific deletion of FGFR4 in cardiomyocytes and functional parameters.

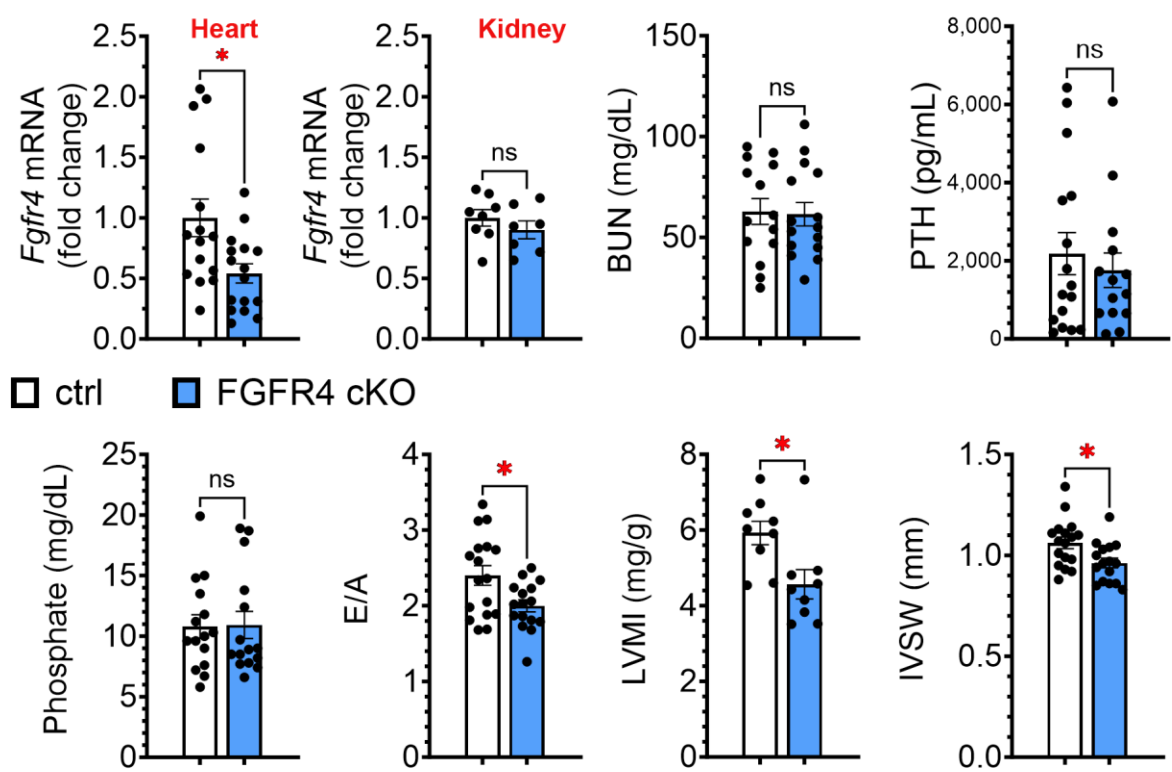

Supplement: Supplementary file 1 [file dc8c88b94457f5c4167d91ce.pdf]
